# Supplementary material for: A comparative theoretical study on energetic substituted 1,2,3- and 1,2,4-triazoles: the azido-cyclization mechanism and the effect of solvent
Source: Royal Society of Chemistry journal article supplement (doi:10.1039/c4nj01781a), 2015-01-01
Supplement: c4nj01781a1.pdf [file c4nj01781a1.pdf]

## Comparative Theoretical Study on Energetic Substituted 1,2,3- and 1,2,4-triazoles: Azido-cyclization Mechanism and Effect of Solvent

Piao He<sup>a</sup>, Jian-Guo Zhang<sup>\*\*a</sup>, Kun Wang<sup>ab</sup>, Xin Jin<sup>a</sup>, Xin Yin<sup>a</sup>, Tong-Lai Zhang<sup>a</sup>, Shaowen Zhang<sup>c</sup>

### 7 Figures and 3 Tables

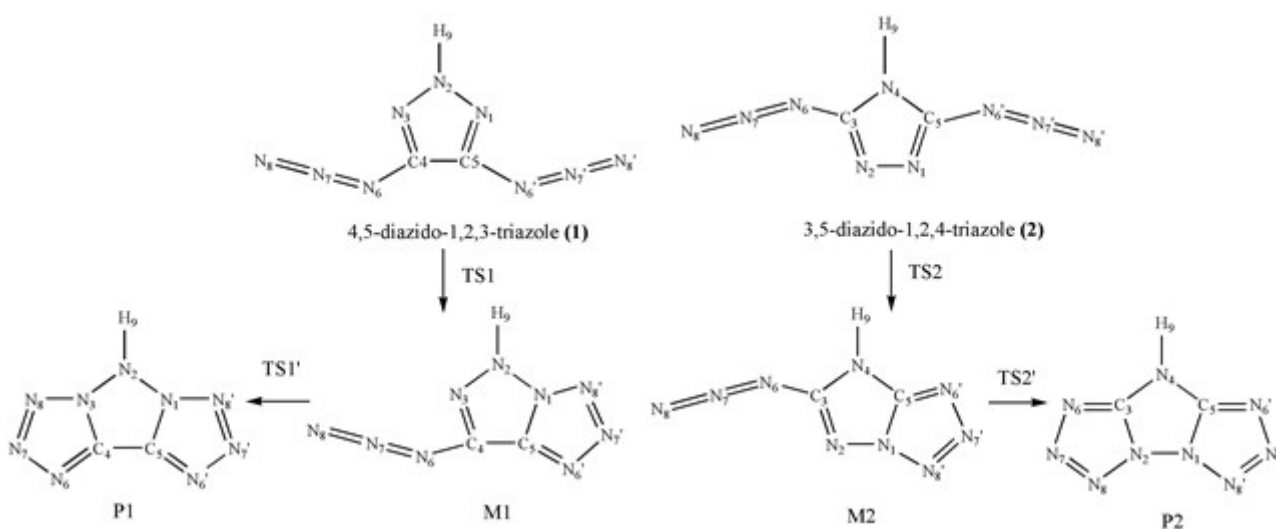

**Scheme 1** The possible pathways of the cyclization of diazidotriazoles

\* Corresponding authors: Jian-Guo Zhang, Tel & Fax: +86 10 68918091.

E-mail: zjgbit@bit.edu.cn

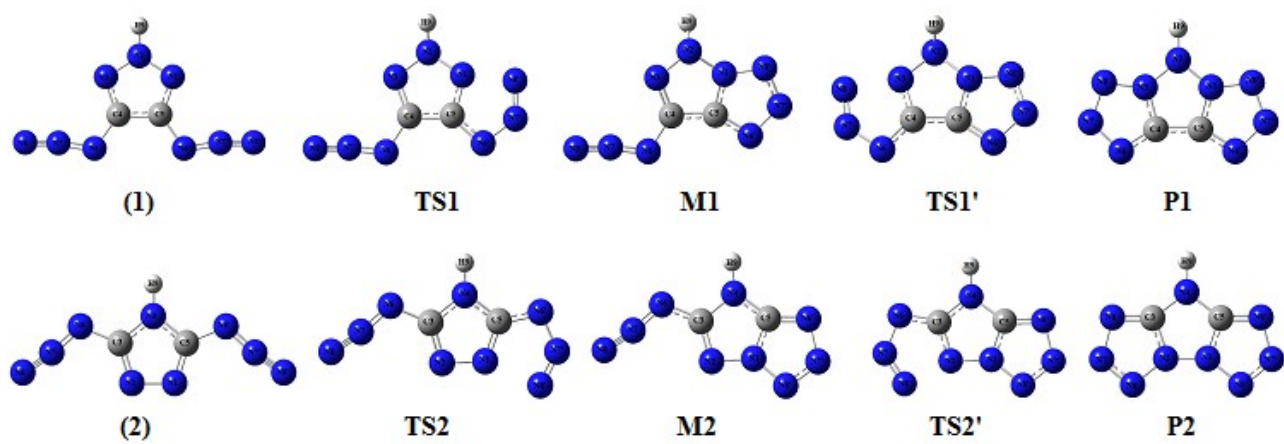

**Fig. 1** The optimized geometry along the reaction paths

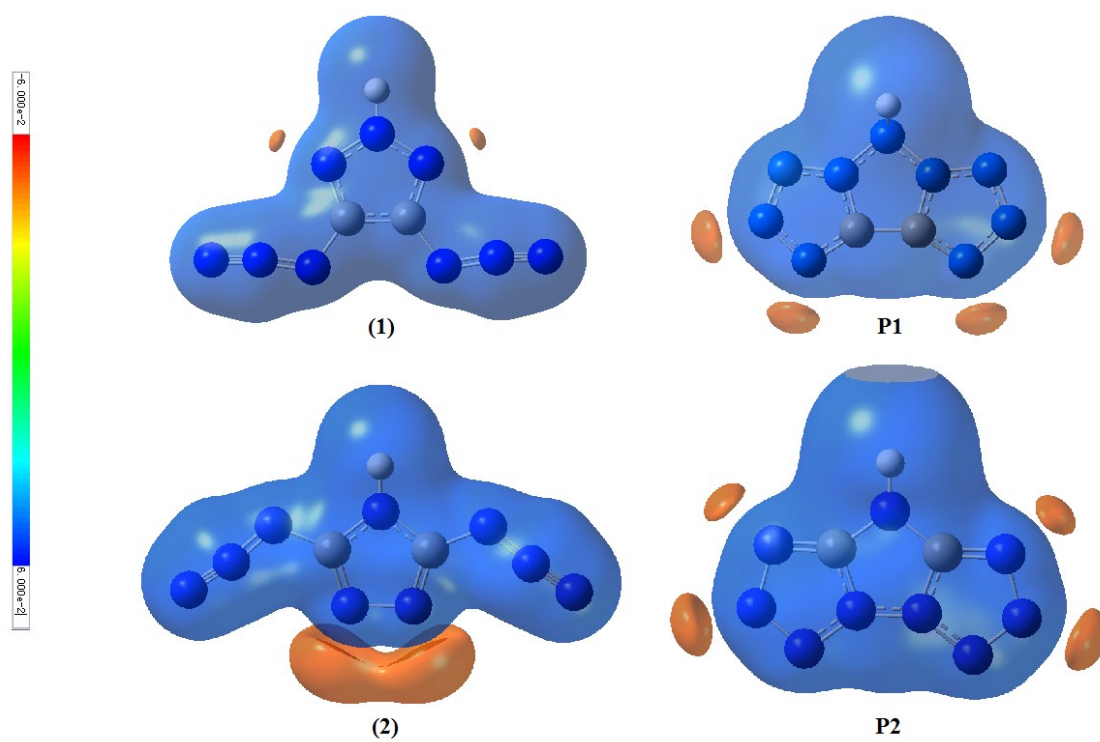

**Fig. 2** Molecular electrostatic potential of main compounds

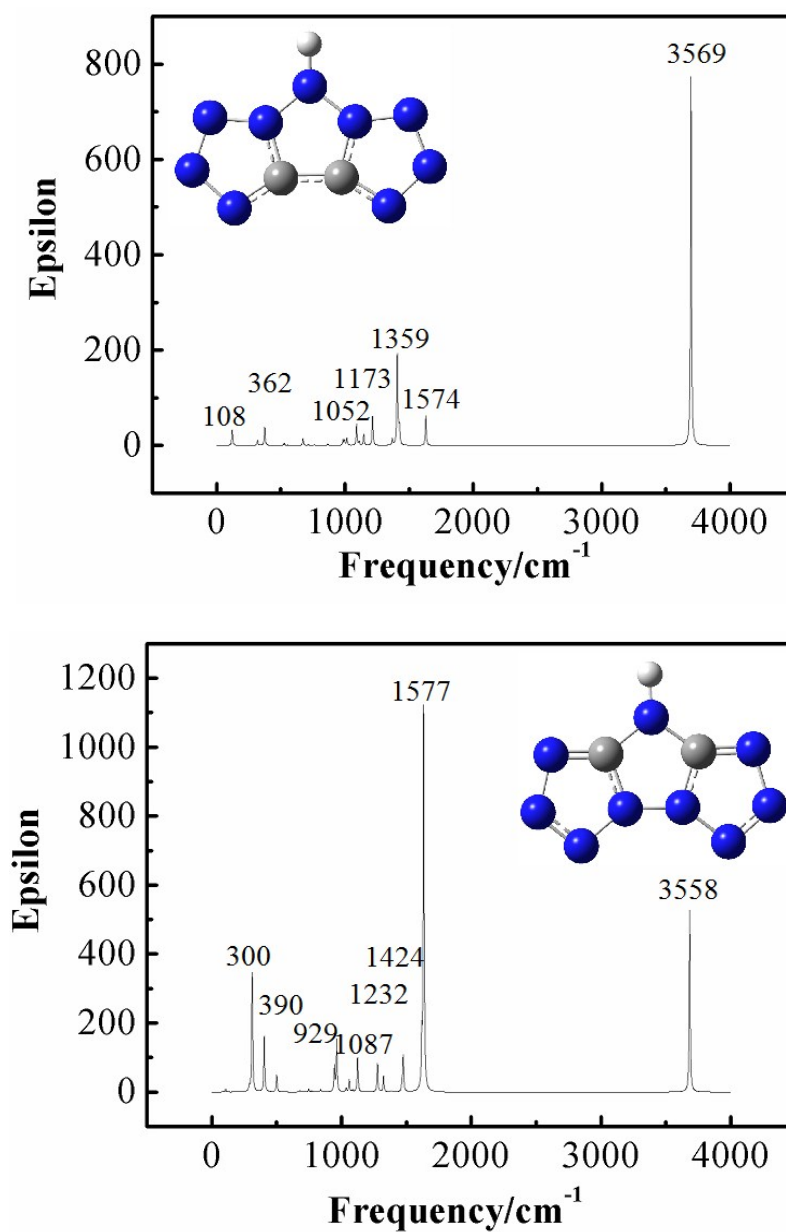

**Fig. 3** IR spectra of calculated compounds (the unit of vertical axis is  $10^{-40} \text{ esu}^2 \cdot \text{cm}^2$ )

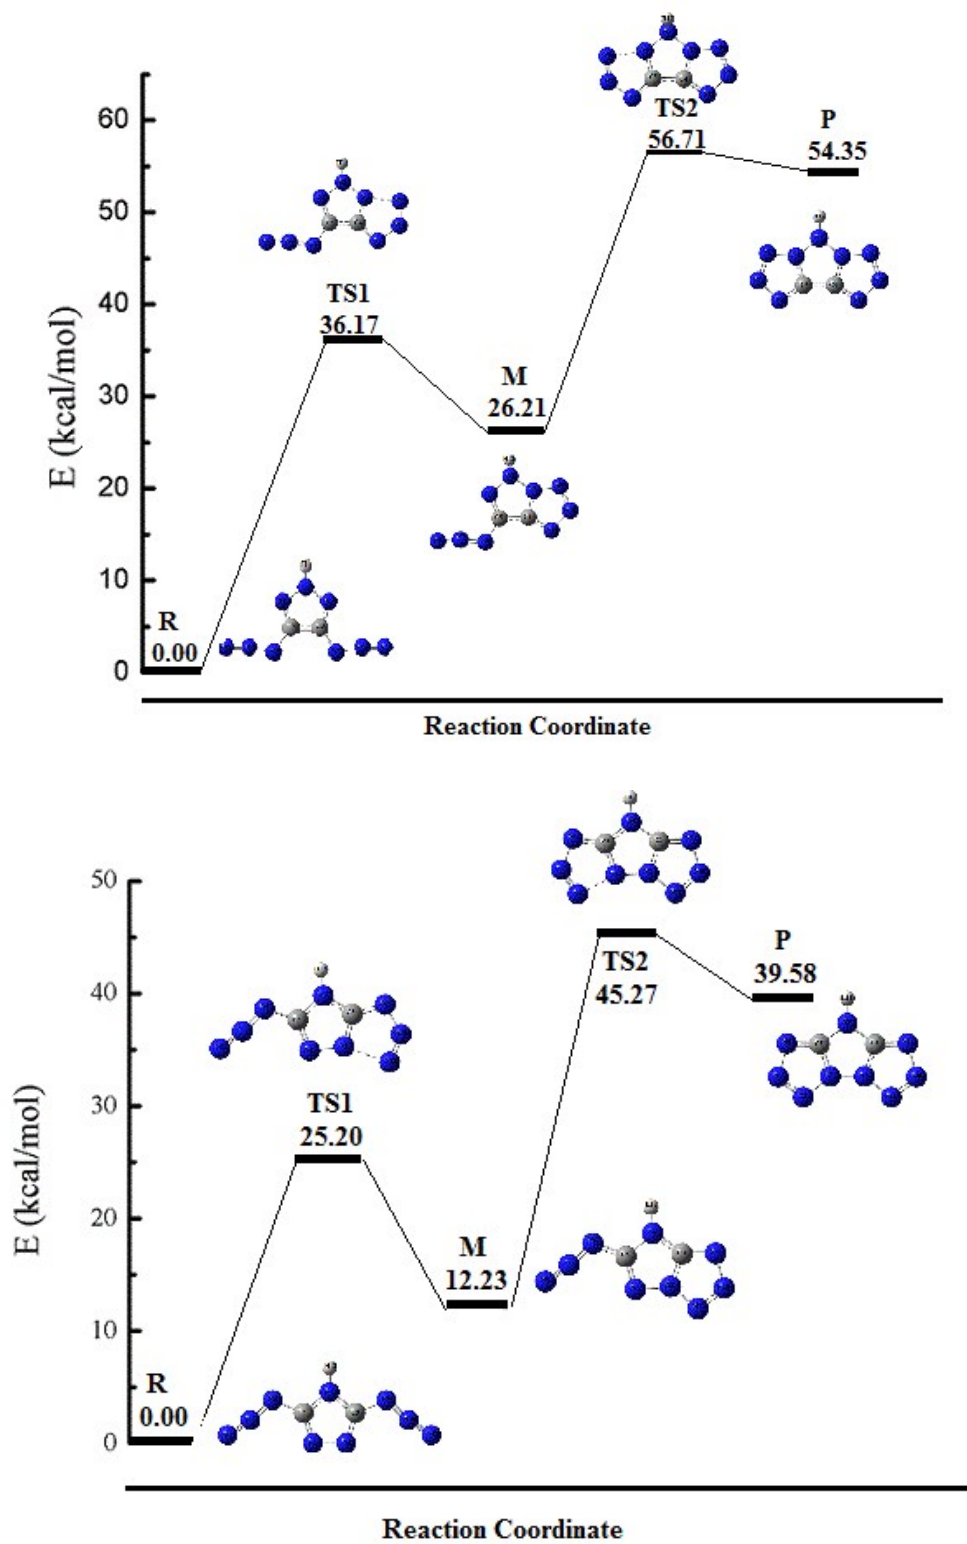

**Fig. 4** The potential energy curves along the azido-cyclization paths of (1) and (2)

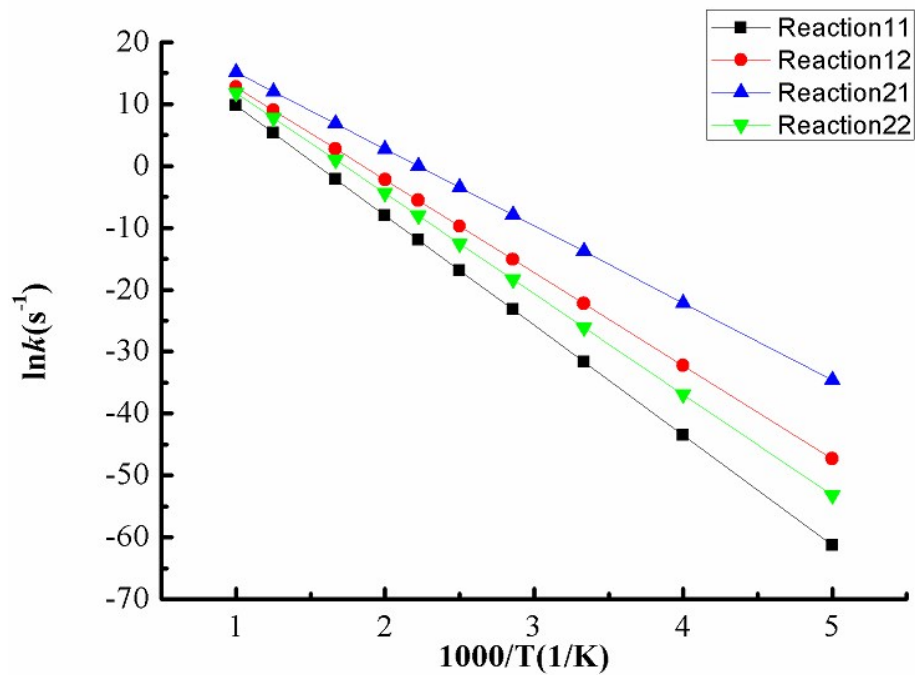

Fig. 5 The reaction rate constants along the reaction paths

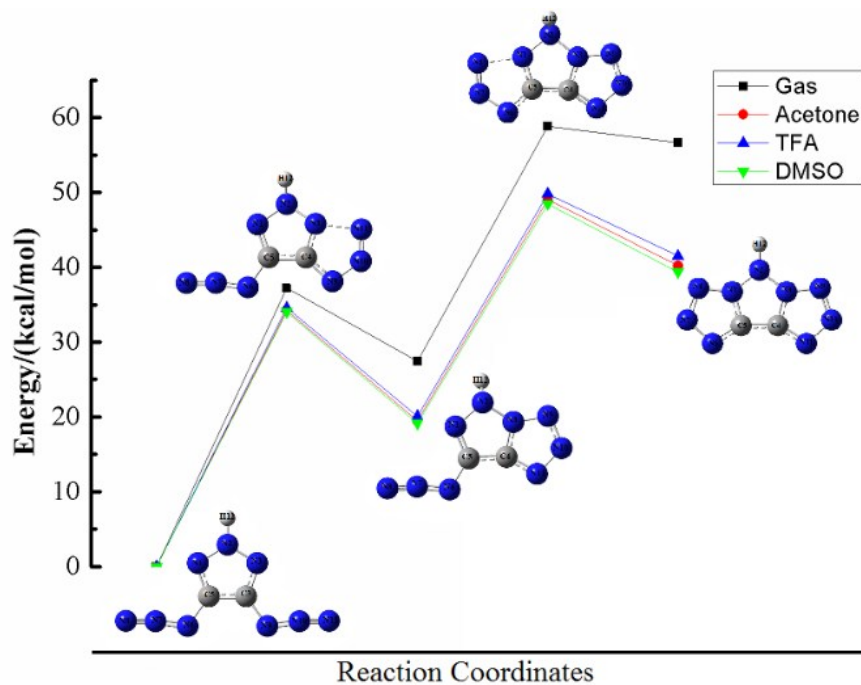

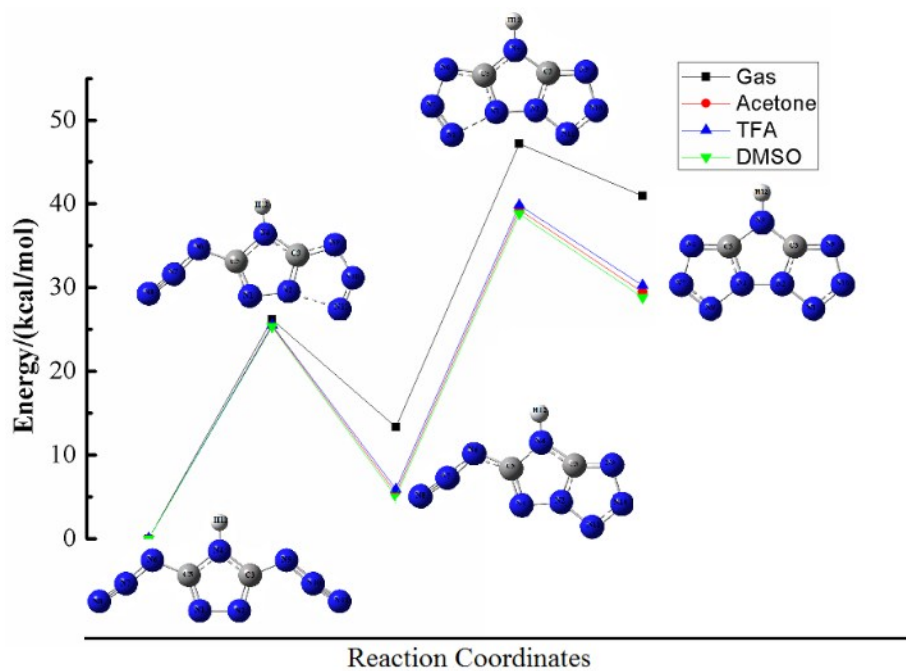

**Fig. 6** The potential energy curves along the azido-cyclization paths in gas phase and different solvents

**Table 1** Thermochemical parameters of two major compounds (kcal/mol)

| Species | <i>ZPE</i> | <i>U</i> | <i>H</i> | <i>G</i> | <i>S</i> | <i>C<sub>v</sub></i> |
|---------|------------|----------|----------|----------|----------|----------------------|
| P1      | 41.762     | 45.838   | 46.430   | 21.838   | 82.482   | 24.557               |
| P2      | 42.037     | 46.592   | 47.184   | 21.353   | 86.638   | 26.539               |

**Table 2** The energy parameters of all possible azido-tetrazolo tautomerizations (kcal/mol)

| B3LYP/6-311G* | $\Delta E$ | $V_{MEP}$ | $\Delta H_{298k}^{\circ}$ | $\Delta G_{298k}^{\circ}$ |
|---------------|------------|-----------|---------------------------|---------------------------|
| Reaction11    | 26.21      | 36.17     | 25.45                     | 27.46                     |
| Reaction 12   | 28.14      | 30.50     | 27.42                     | 29.17                     |
| Reaction 21   | 12.23      | 25.20     | 11.55                     | 13.32                     |
| Reaction 22   | 27.34      | 33.04     | 27.05                     | 27.65                     |

**Table 3** The energy barriers along the azido-cyclization paths in gas phase and different solvents (kcal/mol)

| $V_{MEP}$  | <i>Gas</i> | <i>Acetone</i> | <i>TFA</i> | <i>DMSO</i> |
|------------|------------|----------------|------------|-------------|
| Reaction11 | 36.17      | 34.25          | 34.57      | 34.04       |
| Reaction12 | 30.50      | 29.52          | 29.72      | 29.34       |
| Reaction21 | 26.19      | 25.44          | 25.50      | 25.35       |
| Reaction22 | 33.83      | 33.90          | 33.92      | 33.80       |
