# Supplementary material for: A comparative theoretical study on energetic substituted 1,2,3- and 1,2,4-triazoles: the azido-cyclization mechanism and the effect of solvent
Source: Royal Society of Chemistry journal article supplement (doi:10.1039/c4nj01781a), 2015-01-01
Supplement: c4nj01781a2.pdf [file c4nj01781a2.pdf]

## Comparative Theoretical Study on Energetic Substituted 1,2,3- and 1,2,4-triazoles: Azido-cyclization Mechanism and Effect of Solvent

Piao He<sup>a</sup>, Jian-Guo Zhang<sup>\*\*a</sup>, Kun Wang<sup>ab</sup>, Xin Jin<sup>a</sup>, Xin Yin<sup>a</sup>, Tong-Lai Zhang<sup>a</sup>, Shaowen Zhang<sup>c</sup>

### Supporting Information

#### SI. 1 Optimized parameters

SI. 1 Optimized parameters of title compounds at B3LYP/6-311G\* and MP2/6-311++G\*\* level of theory

| Compound (1) system |       |       |       |       |       |                |       |       |       |       |       |
|---------------------|-------|-------|-------|-------|-------|----------------|-------|-------|-------|-------|-------|
| B3LYP/6-311G*       | (1)   | TS1   | M1    | TS1'  | P1    | MP2/6-311++G** | (1)   | TS1   | M1    | TS1'  | P1    |
| C4-N6               | 1.392 | 1.387 | 1.383 | 1.346 | 1.324 | C4-N6          | 1.395 | 1.390 | 1.387 | 1.349 | 1.329 |
| N6-N7               | 1.238 | 1.241 | 1.244 | 1.340 | 1.347 | N6-N7          | 1.246 | 1.249 | 1.249 | 1.351 | 1.358 |
| N7-N8               | 1.129 | 1.127 | 1.125 | 1.192 | 1.316 | N7-N8          | 1.151 | 1.151 | 1.150 | 1.189 | 1.340 |
| C5-N6'              | 1.392 | 1.358 | 1.326 | 1.320 | 1.324 | C5-N6'         | 1.395 | 1.361 | 1.339 | 1.334 | 1.329 |
| N6'-N7'             | 1.238 | 1.326 | 1.350 | 1.355 | 1.347 | N6'-N7'        | 1.246 | 1.338 | 1.350 | 1.355 | 1.358 |
| N7'-N8'             | 1.129 | 1.209 | 1.316 | 1.313 | 1.316 | N7'-N8'        | 1.151 | 1.201 | 1.348 | 1.343 | 1.340 |
| N3-C4-N6            | 125.7 | 125.8 | 125.7 | 117.2 | 106.9 | N3-C4-N6       | 125.0 | 124.6 | 124.8 | 118.3 | 107.4 |
| C4-N6-N7            | 117.2 | 117.1 | 116.7 | 102.8 | 105.4 | C4-N6-N7       | 115.1 | 114.7 | 114.6 | 101.5 | 105.1 |
| N6-N7-N8            | 172.2 | 172.0 | 171.9 | 126.7 | 113.3 | N6-N7-N8       | 171.9 | 171.8 | 171.8 | 127.7 | 112.8 |
| N1-C5-N6'           | 125.7 | 115.9 | 107.9 | 107.8 | 106.9 | N1-C5-N6'      | 125.0 | 117.0 | 107.5 | 107.6 | 107.4 |
| C5-N6'-N7'          | 117.2 | 103.0 | 104.7 | 104.7 | 105.4 | C5-N6'-N7'     | 115.1 | 101.6 | 104.8 | 104.8 | 105.1 |
| N6'-N7'-N8'         | 172.2 | 125.7 | 113.2 | 113.1 | 113.3 | N6'-N7'-N8'    | 171.9 | 127.3 | 113.1 | 113.0 | 112.8 |

| Compound (2) system |       |       |       |       |       |                |       |       |       |       |       |
|---------------------|-------|-------|-------|-------|-------|----------------|-------|-------|-------|-------|-------|
| B3LYP/6-311G*       | (2)   | TS2   | M2    | TS2'  | P2    | MP2/6-311++G** | (2)   | TS2   | M2    | TS2'  | P2    |
| C3-N6               | 1.388 | 1.385 | 1.381 | 1.337 | 1.308 | C3-N6          | 1.393 | 1.390 | 1.385 | 1.339 | 1.319 |
| N6-N7               | 1.241 | 1.242 | 1.245 | 1.343 | 1.375 | N6-N7          | 1.247 | 1.248 | 1.250 | 1.344 | 1.369 |
| N7-N8               | 1.126 | 1.125 | 1.124 | 1.207 | 1.294 | N7-N8          | 1.150 | 1.149 | 1.149 | 1.205 | 1.334 |
| C5-N6'              | 1.388 | 1.357 | 1.311 | 1.307 | 1.308 | C5-N6'         | 1.393 | 1.359 | 1.322 | 1.311 | 1.319 |
| N6'-N7'             | 1.241 | 1.331 | 1.376 | 1.376 | 1.374 | N6'-N7'        | 1.247 | 1.341 | 1.370 | 1.375 | 1.369 |
| N7'-N8'             | 1.126 | 1.183 | 1.299 | 1.298 | 1.294 | N7'-N8'        | 1.150 | 1.181 | 1.337 | 1.309 | 1.334 |
| N2-C3-N6            | 129.3 | 128.9 | 127.5 | 116.4 | 109.1 | N2-C3-N6       | 128.6 | 128.0 | 126.7 | 116.8 | 108.8 |
| C3-N6-N7            | 116.3 | 116.5 | 116.3 | 102.6 | 103.8 | C3-N6-N7       | 113.9 | 114.1 | 114.0 | 102.2 | 104.1 |
| N6-N7-N8            | 172.2 | 172.3 | 172.2 | 124.6 | 114.2 | N6-N7-N8       | 172.2 | 172.3 | 172.2 | 125.0 | 113.5 |
| N1-C5-N6'           | 129.3 | 120.8 | 110.4 | 109.7 | 109.1 | N1-C5-N6'      | 128.6 | 121.5 | 110.2 | 109.6 | 108.8 |
| C5-N6'-N7'          | 116.3 | 101.7 | 102.9 | 103.4 | 103.8 | C5-N6'-N7'     | 113.9 | 99.9  | 103.1 | 103.4 | 104.1 |
| N6'-N7'-N8'         | 172.2 | 125.7 | 113.2 | 113.1 | 113.3 | N6'-N7'-N8'    | 172.2 | 130.6 | 113.3 | 113.6 | 113.5 |

\* Corresponding authors: Jian-Guo Zhang, Tel & Fax: +86 10 68918091.

E-mail: zjgbit@bit.edu.cn

## SI. 2 NBO charges

SI. 2 NBO charges for all atoms along the reaction paths

| Atom | (1)   | TS1   | M1    | TS1'   | P1    | Atom | (2)   | TS2   | M2    | TS2'  | P2    |
|------|-------|-------|-------|--------|-------|------|-------|-------|-------|-------|-------|
| N1   | -0.29 | -0.20 | -0.02 | -0.027 | -0.01 | N1   | -0.33 | -0.26 | -0.05 | -0.04 | -0.05 |
| N2   | -0.12 | -0.15 | -0.19 | -0.186 | -0.20 | N2   | -0.33 | -0.31 | -0.32 | -0.22 | -0.05 |
| N3   | -0.29 | -0.27 | -0.29 | -0.237 | -0.01 | C3   | 0.50  | 0.52  | 0.54  | 0.56  | 0.52  |
| C4   | 0.25  | 0.28  | 0.31  | 0.332  | 0.27  | N4   | -0.56 | -0.56 | -0.57 | -0.57 | -0.58 |
| C5   | 0.25  | 0.29  | 0.26  | 0.279  | 0.27  | C5   | 0.50  | 0.52  | 0.49  | 0.51  | 0.52  |
| N6   | -0.34 | -0.33 | -0.33 | -0.336 | -0.27 | N6   | -0.37 | -0.37 | -0.37 | -0.37 | -0.33 |
| N7   | 0.26  | 0.26  | 0.26  | 0.088  | -0.03 | N7   | 0.26  | 0.26  | 0.26  | 0.07  | -0.02 |
| N8   | -0.02 | 0.00  | 0.02  | 0.063  | -0.08 | N8   | 0.01  | 0.02  | 0.04  | 0.05  | -0.05 |
| N6'  | -0.34 | -0.35 | -0.28 | -0.265 | -0.27 | N6'  | -0.37 | -0.41 | -0.35 | -0.33 | -0.33 |
| N7'  | 0.26  | 0.06  | -0.04 | -0.036 | -0.03 | N7'  | 0.26  | 0.09  | -0.05 | -0.03 | -0.02 |
| N8'  | -0.02 | 0.01  | -0.08 | -0.063 | -0.08 | N8'  | 0.01  | 0.06  | -0.07 | -0.05 | -0.05 |

## SI. 3 Energy of singlet and triplet

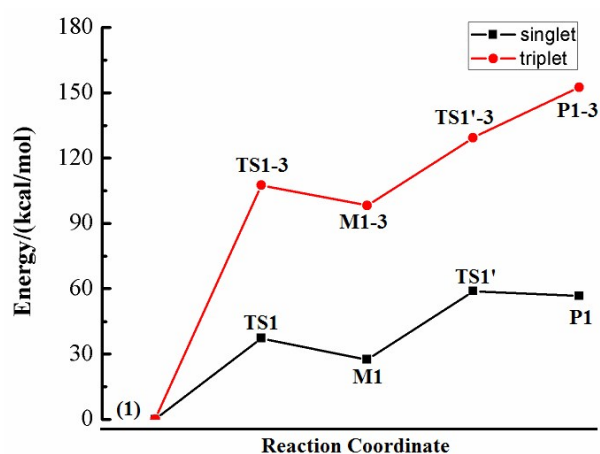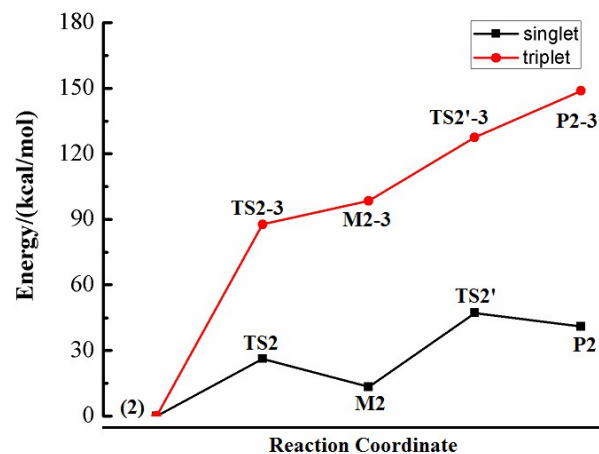

SI. 3a The potential energy curves of singlet and triplet for azido-cyclization paths of (1) and (2)

SI. 3b The energy parameters of singlet and triplet for azido-cyclization paths of (1) and (2)

| Energy             | (1)     | TS1     | M1      | TS1'    | P1      | Energy | (2)     | TS2     | M2      | TS2'    | P2      |
|--------------------|---------|---------|---------|---------|---------|--------|---------|---------|---------|---------|---------|
| E-1 <sup>[a]</sup> | -       | -       | -       | -       | -       | E-1    | -       | -       | -       | -       | -       |
|                    | 569.474 | 569.416 | 569.432 | 569.384 | 569.388 |        | 569.492 | 569.452 | 569.473 | 569.420 | 569.429 |
|                    | 624     | 983     | 852     | 242     | 000     |        | 802     | 629     | 307     | 654     | 726     |
| G-1 <sup>[a]</sup> | -       | -       | -       | -       | -       | G-1    | -       | -       | -       | -       | -       |
|                    | 569.510 | 569.450 | 569.466 | 569.416 | 569.419 |        | 569.527 | 569.486 | 569.506 | 569.452 | 569.462 |
|                    | 007     | 672     | 242     | 195     | 751     |        | 988     | 251     | 749     | 829     | 687     |
| E-3 <sup>[b]</sup> | -       | -       | -       | -       | -       | E-3    | -       | -       | -       | -       | -       |
|                    | 569.339 | 569.305 | 569.319 | 569.270 | 569.234 |        | 569.353 | 569.352 | 569.337 | 569.292 | 569.259 |
|                    | 889     | 999     | 662     | 407     | 786     |        | 103     | 753     | 799     | 094     | 105     |
| G-3 <sup>[b]</sup> | -       | -       | -       | -       | -       | G-3    | -       | -       | -       | -       | -       |
|                    | 569.375 | 569.338 | 569.353 | 569.303 | 569.267 |        | 569.385 | 569.388 | 569.371 | 569.324 | 569.290 |
|                    | 508     | 676     | 378     | 85      | 057     |        | 755     | 321     | 072     | 829     | 899     |

[a] E-1 is total energy of singlet and G-1 is sum of electronic and thermal free energies of singlet.

[b] E-1 is total energy of triplet and G-1 is sum of electronic and thermal free energies of triplet.
